# Supplementary material for: CDK12 controls G1/S progression by regulating RNAPII processivity at core DNA replication genes
Source: PubMed Central journal article supplement (PMC6727028; doi:10.15252/embr.201847592), 2019-07-25

Figure: 3e

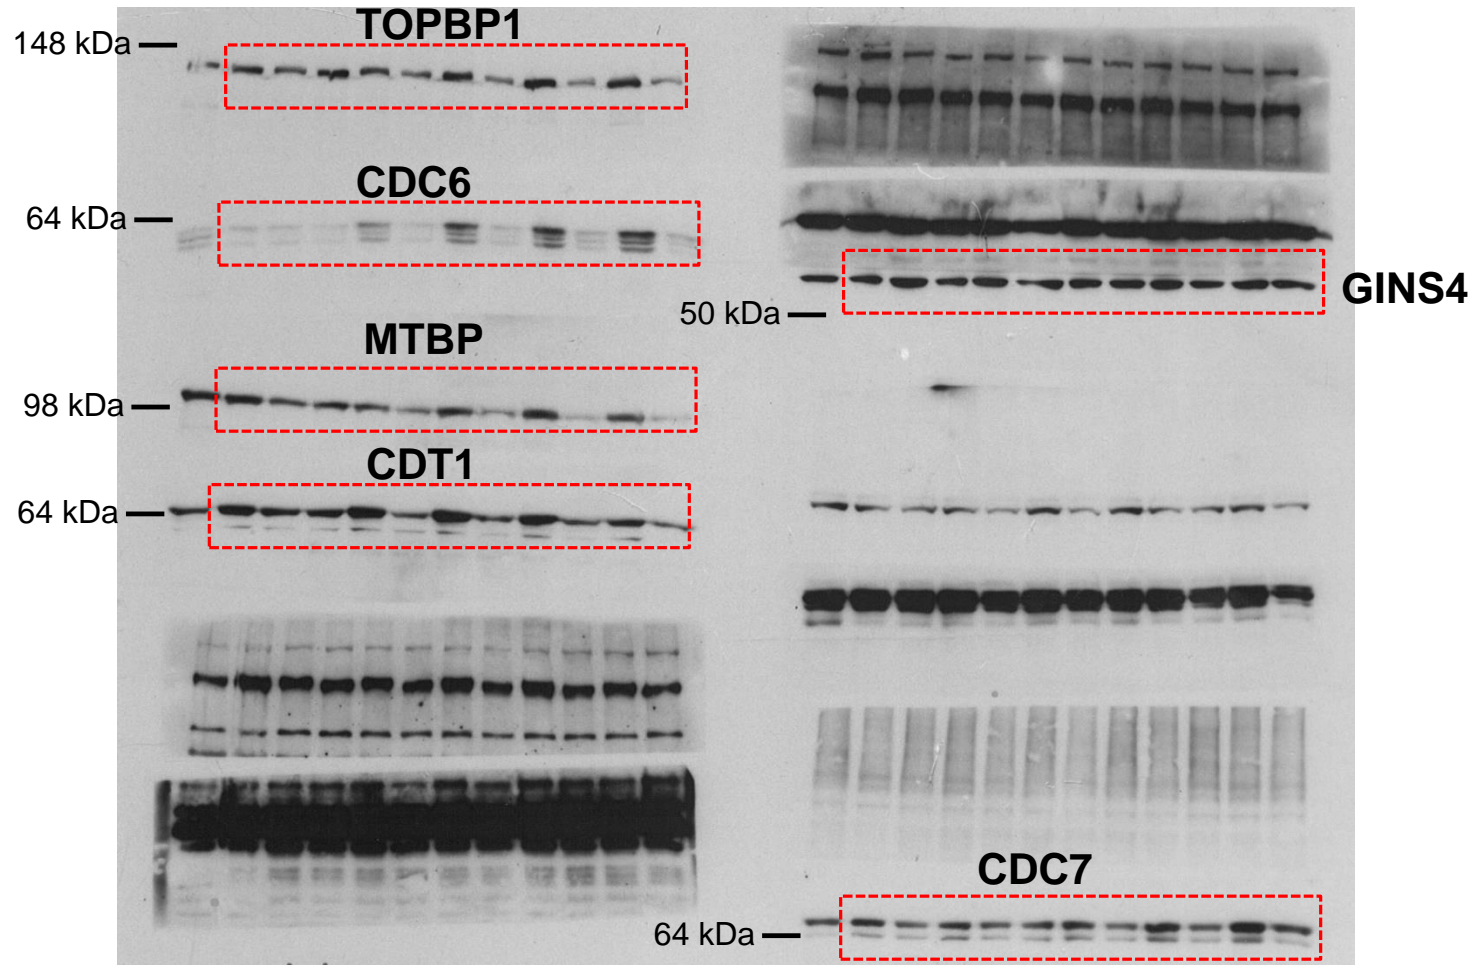

Figure: 3e

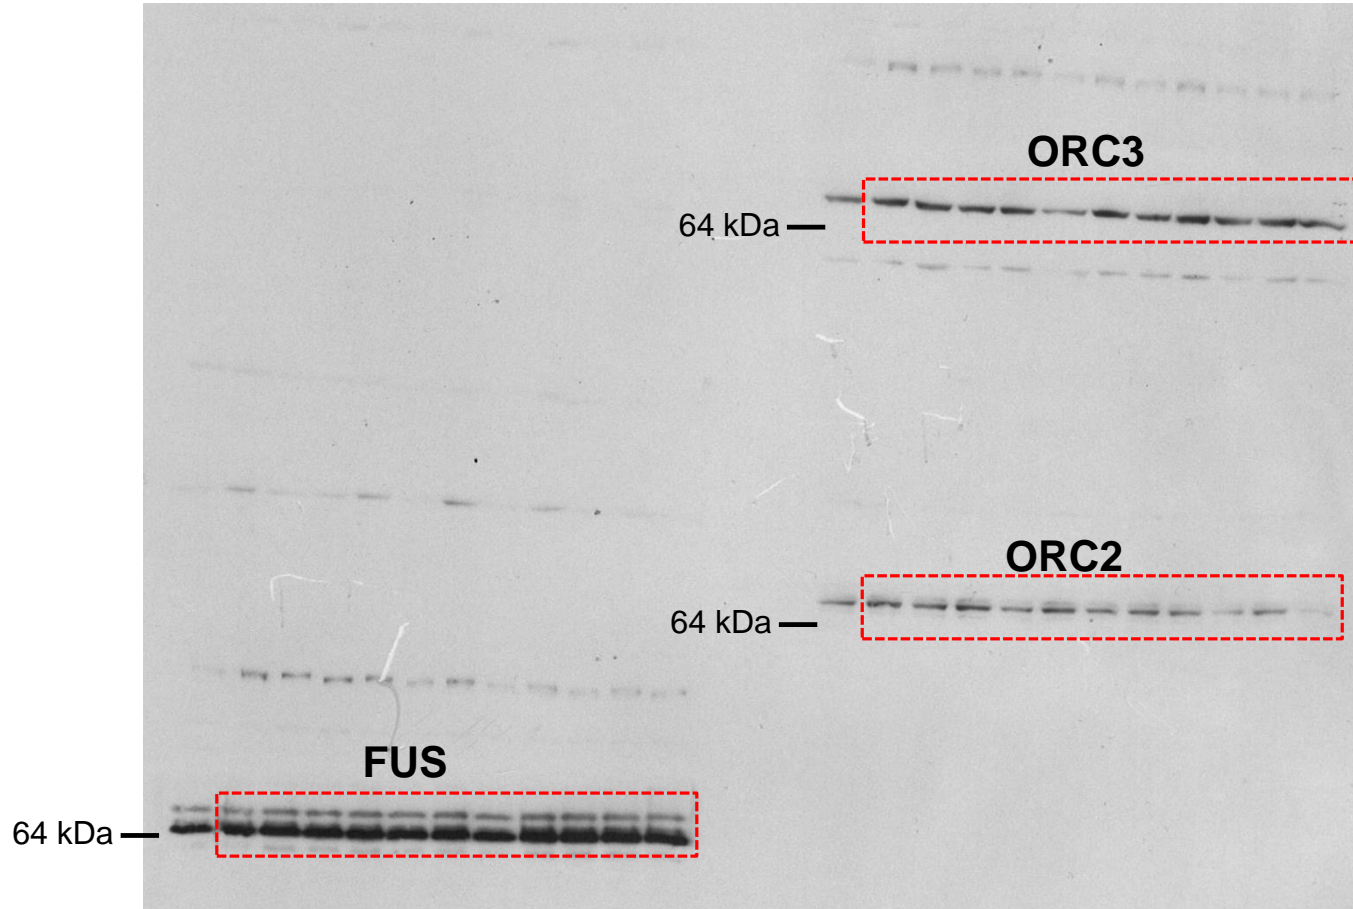

Figure: 3f

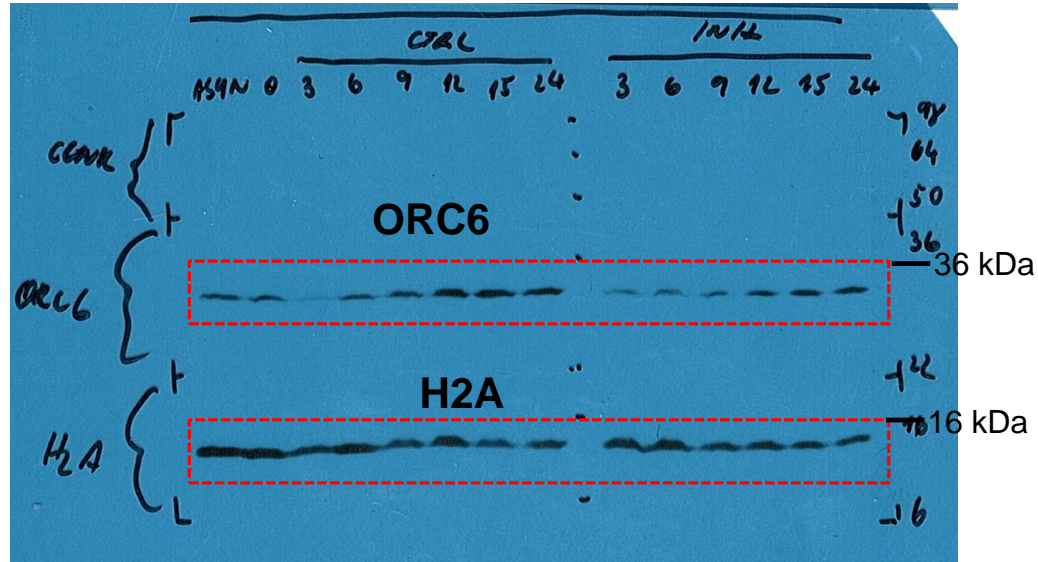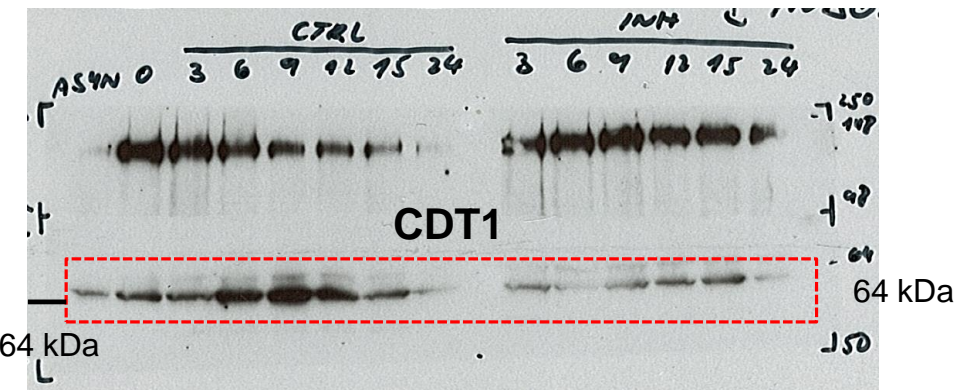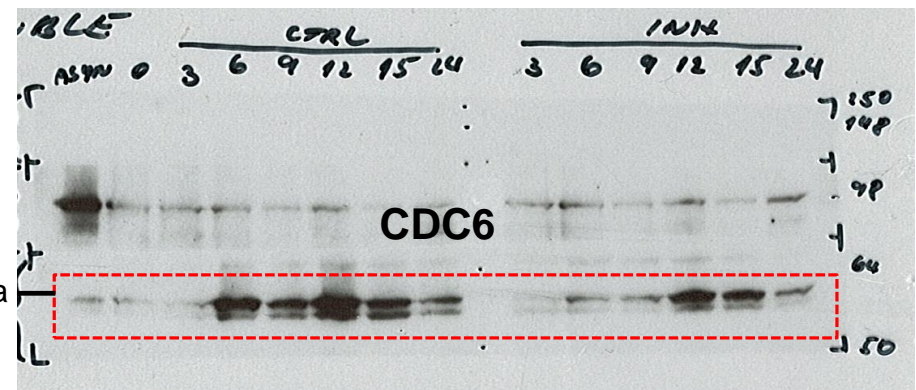

Supplement: EMBR-20-e47592-s008.pdf [file EMBR-20-e47592-s008.pdf]
